# Supplementary material
Source: publisher site journal article supplement (https://www.spandidos-publications.com/6844/downloadSupplementary)
Supplement: Supplementary file 1 [file downloadSupplementary]

## Sheet: Sheet1
Table SI. Downregulated genes in PSAT1-silenced PC9 cells are listed with their log2 (fold-change), P- and q-values (adjusted p).
Gene ID	Symbol	log2(shPSAT1/Control)	P-value	q-value
ENSG00000197780	TAF13	-0.543523	0.00015	0.0053038
ENSG00000168765	GSTM4	-1.31818	5e-05	0.00214872
ENSG00000134184	GSTM1	-4.20323	5e-05	0.00214872
ENSG00000134202	GSTM3	-0.908739	5e-05	0.00214872
ENSG00000155380	SLC16A1	-0.581726	0.00015	0.0053038
ENSG00000116774	OLFML3	-0.926281	5e-05	0.00214872
ENSG00000116661	FBXO2	-2.92173	5e-05	0.00214872
ENSG00000265107	GJA5	-1.20716	5e-05	0.00214872
ENSG00000196154	S100A4	-0.936569	5e-05	0.00214872
ENSG00000196754	S100A2	-0.686088	0.00195	0.0401006
ENSG00000162729	IGSF8	-0.663068	5e-05	0.00214872
ENSG00000116701	NCF2	-2.55749	5e-05	0.00214872
ENSG00000023572	GLRX2	-0.578467	5e-05	0.00214872
ENSG00000118197	DDX59	-0.614415	0.00015	0.0053038
ENSG00000163545	NUAK2	-0.947219	5e-05	0.00214872
ENSG00000092969	TGFB2	-0.911982	0.0001	0.00380045
ENSG00000233461	RP11-295G20.2	-0.533819	0.0001	0.00380045
ENSG00000143674	MLK4	-0.653984	5e-05	0.00214872
ENSG00000168275	COA6	-0.5111	5e-05	0.00214872
ENSG00000117318	ID3	-0.957179	5e-05	0.00214872
ENSG00000182901	RGS7	-2.49913	5e-05	0.00214872
ENSG00000130695	CEP85	-0.621537	0.0002	0.00669062
ENSG00000175793	SFN	-0.722154	5e-05	0.00214872
ENSG00000092853	CLSPN	-1.13605	5e-05	0.00214872
ENSG00000171793	CTPS1	-1.02625	5e-05	0.00214872
ENSG00000117407	ARTN	-1.80731	5e-05	0.00214872
ENSG00000081870	HSPB11	-0.685919	5e-05	0.00214872
ENSG00000169174	PCSK9	-0.941697	5e-05	0.00214872
ENSG00000116717	GADD45A	-0.7616	5e-05	0.00214872
ENSG00000116729	WLS	-1.81587	5e-05	0.00214872
ENSG00000142871	CYR61	-0.794022	5e-05	0.00214872
ENSG00000148798	INA	-1.24704	5e-05	0.00214872
ENSG00000225383	SFTA1P	-2.38532	5e-05	0.00214872
ENSG00000198825	INPP5F	-0.82724	0.00255	0.0488434
ENSG00000065328	MCM10	-1.05267	0.0002	0.00669062
ENSG00000122873	CISD1	-0.577468	5e-05	0.00214872
ENSG00000122862	SRGN	-0.738706	5e-05	0.00214872
ENSG00000198682	PAPSS2	-1.7794	0.0004	0.0116187
ENSG00000152766	ANKRD22	-0.771722	0.00105	0.0253209
ENSG00000095596	CYP26A1	-0.912647	0.00015	0.0053038
ENSG00000165887	ANKRD2	-0.570447	0.0006	0.0158362
ENSG00000023445	BIRC3	-0.784098	5e-05	0.00214872
ENSG00000137713	PPP2R1B	-1.10622	0.0003	0.00945113
ENSG00000150787	PTS	-0.690241	5e-05	0.00214872
ENSG00000129173	E2F8	-0.752696	5e-05	0.00214872
ENSG00000185201	IFITM2	-1.85949	5e-05	0.00214872
ENSG00000189057	FAM111B	-1.28899	5e-05	0.00214872
ENSG00000134824	FADS2	-1.15202	0.00245	0.0476911
ENSG00000173727	CMB9-22P13.1	-0.631684	5e-05	0.00214872
ENSG00000109861	CTSC	-0.63205	0.0001	0.00380045
ENSG00000173391	OLR1	-1.13971	5e-05	0.00214872
ENSG00000076248	UNG	-0.576576	5e-05	0.00214872
ENSG00000280634	THRIL	-0.821841	0.0006	0.0158362
ENSG00000184992	BRI3BP	-1.03044	5e-05	0.00214872
ENSG00000111450	STX2	-0.974759	0.00175	0.0369395
ENSG00000134531	EMP1	-0.818211	0.00015	0.0053038
ENSG00000111341	MGP	-2.52874	5e-05	0.00214872
ENSG00000139055	ERP27	-0.653239	0.00035	0.010475
ENSG00000111348	ARHGDIB	-0.782833	5e-05	0.00214872
ENSG00000060982	BCAT1	-1.77259	5e-05	0.00214872
ENSG00000205693	MANSC4	-1.29646	5e-05	0.00214872
ENSG00000151743	AMN1	-0.955752	0.0003	0.00945113
ENSG00000167779	IGFBP6	-0.649794	5e-05	0.00214872
ENSG00000153233	PTPRR	-0.833626	5e-05	0.00214872
ENSG00000067798	NAV3	-1.88037	5e-05	0.00214872
ENSG00000059804	SLC2A3	-0.98784	5e-05	0.00214872
ENSG00000110852	CLEC2B	-0.904584	0.0001	0.00380045
ENSG00000275216	RP11-54H7.4	-0.586164	5e-05	0.00214872
ENSG00000120662	MTRF1	-0.767646	0.00085	0.0211365
ENSG00000136167	LCP1	-4.47014	5e-05	0.00214872
ENSG00000184564	SLITRK6	-0.513385	5e-05	0.00214872
ENSG00000198805	PNP	-0.690448	5e-05	0.00214872
ENSG00000100479	POLE2	-0.783458	0.00135	0.0305344
ENSG00000125378	BMP4	-1.44042	5e-05	0.00214872
ENSG00000211448	DIO2	-1.14647	0.0001	0.00380045
ENSG00000134152	KATNBL1	-0.813456	5e-05	0.00214872
ENSG00000092470	WDR76	-0.783177	0.0008	0.0201019
ENSG00000090487	SPG21	-0.804652	5e-05	0.00214872
ENSG00000075131	TIPIN	-0.738873	0.00035	0.010475
ENSG00000169032	MAP2K1	-0.787337	5e-05	0.00214872
ENSG00000102886	GDPD3	-1.56385	0.00015	0.0053038
ENSG00000091651	ORC6	-0.957659	5e-05	0.00214872
ENSG00000171208	NETO2	-1.10118	5e-05	0.00214872
ENSG00000103005	USB1	-0.553626	0.0002	0.00669062
ENSG00000102996	MMP15	-0.62956	5e-05	0.00214872
ENSG00000103034	NDRG4	-0.935744	0.0007	0.0179939
ENSG00000159593	NAE1	-0.586867	0.00015	0.0053038
ENSG00000135723	FHOD1	-0.65836	0.00215	0.0428466
ENSG00000039523	FAM65A	-1.05902	0.0001	0.00380045
ENSG00000102977	ACD	-0.70027	0.00035	0.010475
ENSG00000072736	NFATC3	-0.945701	0.00225	0.0445745
ENSG00000103018	CYB5B	-0.651461	5e-05	0.00214872
ENSG00000180917	CMTR2	-0.592656	0.0017	0.0362494
ENSG00000172137	CALB2	-0.753758	5e-05	0.00214872
ENSG00000168404	MLKL	-1.0013	0.0003	0.00945113
ENSG00000171928	TVP23B	-0.535894	0.0004	0.0116187
ENSG00000172123	SLFN12	-0.584338	0.0015	0.0330789
ENSG00000083457	ITGAE	-0.701678	0.00015	0.0053038
ENSG00000094804	CDC6	-1.02765	0.0006	0.0158362
ENSG00000279806	RP11-58O9.2	-0.52211	0.0014	0.031411
ENSG00000108244	KRT23	-0.54112	0.0025	0.0483276
ENSG00000161905	ALOX15	-1.18099	5e-05	0.00214872
ENSG00000141480	ARRB2	-0.502919	0.0004	0.0116187
ENSG00000108561	C1QBP	-0.770358	0.0008	0.0201019
ENSG00000108960	MMD	-0.571713	0.0001	0.00380045
ENSG00000219200	RNASEK	-0.615789	5e-05	0.00214872
ENSG00000108984	MAP2K6	-0.93021	0.00175	0.0369395
ENSG00000167695	FAM57A	-0.747409	5e-05	0.00214872
ENSG00000170175	CHRNB1	-0.83959	0.0002	0.00669062
ENSG00000129667	RHBDF2	-0.891809	0.00035	0.010475
ENSG00000183048	SLC25A10	-0.866018	0.00195	0.0401006
ENSG00000169689	STRA13	-0.843623	5e-05	0.00214872
ENSG00000134265	NAPG	-1.12019	5e-05	0.00214872
ENSG00000255112	CHMP1B	-0.642309	0.00015	0.0053038
ENSG00000267165	RP11-78A19.3	-0.723043	0.00135	0.0305344
ENSG00000141401	IMPA2	-1.44422	5e-05	0.00214872
ENSG00000176014	TUBB6	-0.797056	0.00255	0.0488434
ENSG00000141385	AFG3L2	-0.875444	5e-05	0.00214872
ENSG00000141391	SLMO1	-1.10597	5e-05	0.00214872
ENSG00000128789	PSMG2	-0.664633	0.00015	0.0053038
ENSG00000085415	SEH1L	-1.20752	5e-05	0.00214872
ENSG00000177150	FAM210A	-0.991512	0.00225	0.0445745
ENSG00000079134	THOC1	-0.97522	0.00125	0.028738
ENSG00000101557	USP14	-1.23979	5e-05	0.00214872
ENSG00000158201	ABHD3	-0.821914	5e-05	0.00214872
ENSG00000101574	METTL4	-1.28722	5e-05	0.00214872
ENSG00000080986	NDC80	-0.915103	5e-05	0.00214872
ENSG00000101596	SMCHD1	-1.06917	0.00035	0.010475
ENSG00000101577	LPIN2	-0.885459	5e-05	0.00214872
ENSG00000101608	MYL12A	-1.36467	5e-05	0.00214872
ENSG00000118680	MYL12B	-1.22317	5e-05	0.00214872
ENSG00000259256	RP11-838N2.3	-1.00275	5e-05	0.00214872
ENSG00000177426	TGIF1	-0.529222	0.00015	0.0053038
ENSG00000262001	DLGAP1-AS2	-0.784224	0.0011	0.0262248
ENSG00000266401	RP11-874J12.4	-1.18188	5e-05	0.00214872
ENSG00000154839	SKA1	-0.762502	0.0001	0.00380045
ENSG00000263753	LINC00667	-0.943422	5e-05	0.00214872
ENSG00000132199	ENOSF1	-1.04929	0.0003	0.00945113
ENSG00000176890	TYMS	-1.75017	5e-05	0.00214872
ENSG00000166396	SERPINB7	-1.56017	5e-05	0.00214872
ENSG00000176105	YES1	-1.06612	5e-05	0.00214872
ENSG00000206418	RAB12	-1.0155	5e-05	0.00214872
ENSG00000168502	MTCL1	-2.13288	5e-05	0.00214872
ENSG00000178127	NDUFV2	-1.28451	5e-05	0.00214872
ENSG00000128791	TWSG1	-1.06871	5e-05	0.00214872
ENSG00000017797	RALBP1	-1.07636	5e-05	0.00214872
ENSG00000101558	VAPA	-1.13113	5e-05	0.00214872
ENSG00000129355	CDKN2D	-0.659584	0.0001	0.00380045
ENSG00000129354	AP1M2	-0.986287	5e-05	0.00214872
ENSG00000130475	FCHO1	-0.83457	5e-05	0.00214872
ENSG00000105173	CCNE1	-1.08308	5e-05	0.00214872
ENSG00000232677	LINC00665	-1.54655	5e-05	0.00214872
ENSG00000011422	PLAUR	-0.553681	0.00015	0.0053038
ENSG00000178150	ZNF114	-1.12959	5e-05	0.00214872
ENSG00000142227	EMP3	-0.97477	0.0001	0.00380045
ENSG00000276043	UHRF1	-0.551114	0.0003	0.00945113
ENSG00000186806	VSIG10L	-0.963495	5e-05	0.00214872
ENSG00000167555	ZNF528	-0.940519	0.0008	0.0201019
ENSG00000167766	ZNF83	-1.35341	5e-05	0.00214872
ENSG00000182986	ZNF320	-1.38671	5e-05	0.00214872
ENSG00000160336	ZNF761	-0.725541	5e-05	0.00214872
ENSG00000130844	ZNF331	-1.01466	5e-05	0.00214872
ENSG00000130433	CACNG6	-0.594957	5e-05	0.00214872
ENSG00000095752	IL11	-1.66632	5e-05	0.00214872
ENSG00000188785	ZNF548	-1.2274	0.0002	0.00669062
ENSG00000125657	TNFSF9	-0.499948	0.00175	0.0369395
ENSG00000171848	RRM2	-0.656386	0.00035	0.010475
ENSG00000186132	C2orf76	-0.693177	5e-05	0.00214872
ENSG00000136717	BIN1	-0.557698	0.00035	0.010475
ENSG00000076003	MCM6	-0.971107	5e-05	0.00214872
ENSG00000144354	CDCA7	-0.88733	5e-05	0.00214872
ENSG00000198130	HIBCH	-0.92144	0.00045	0.0128703
ENSG00000163283	ALPP	-0.792572	0.0002	0.00669062
ENSG00000115468	EFHD1	-1.14393	5e-05	0.00214872
ENSG00000163235	TGFA	-0.693938	5e-05	0.00214872
ENSG00000101003	GINS1	-0.590855	0.0002	0.00669062
ENSG00000170191	NANP	-0.687035	0.0012	0.0278946
ENSG00000101412	E2F1	-0.735113	5e-05	0.00214872
ENSG00000101000	PROCR	-1.20603	5e-05	0.00214872
ENSG00000061656	SPAG4	-0.665849	0.00015	0.0053038
ENSG00000149636	DSN1	-0.65674	0.0004	0.0116187
ENSG00000101347	SAMHD1	-0.506656	0.0003	0.00945113
ENSG00000196839	ADA	-0.821788	0.00045	0.0128703
ENSG00000101443	WFDC2	-1.4588	5e-05	0.00214872
ENSG00000183963	SMTN	-0.871431	0.0006	0.0158362
ENSG00000100234	TIMP3	-1.67608	5e-05	0.00214872
ENSG00000144821	MYH15	-2.05532	5e-05	0.00214872
ENSG00000121579	NAA50	-0.53724	0.0001	0.00380045
ENSG00000163430	FSTL1	-2.36552	5e-05	0.00214872
ENSG00000073111	MCM2	-0.565578	0.00025	0.00815175
ENSG00000168917	SLC35G2	-0.606096	0.0006	0.0158362
ENSG00000069849	ATP1B3	-0.74827	0.00105	0.0253209
ENSG00000163710	PCOLCE2	-0.991424	0.0001	0.00380045
ENSG00000114771	AADAC	-1.08923	5e-05	0.00214872
ENSG00000250588	IQCJ-SCHIP1	-0.627272	0.00145	0.0323165
ENSG00000163577	EIF5A2	-0.792567	0.00245	0.0476911
ENSG00000114315	HES1	-0.516147	0.00015	0.0053038
ENSG00000249992	TMEM158	-0.631875	5e-05	0.00214872
ENSG00000068028	RASSF1	-0.657183	0.0002	0.00669062
ENSG00000114405	C3orf14	-0.752304	0.00065	0.0170219
ENSG00000187098	MITF	-0.720965	0.00055	0.0149643
ENSG00000227124	ZNF717	-0.808271	0.0005	0.0138972
ENSG00000164111	ANXA5	-0.499147	0.00035	0.010475
ENSG00000137440	FGFBP1	-1.48618	5e-05	0.00214872
ENSG00000163950	SLBP	-0.694354	5e-05	0.00214872
ENSG00000151729	SLC25A4	-0.531414	0.0003	0.00945113
ENSG00000163697	APBB2	-0.821767	0.00105	0.0253209
ENSG00000154277	UCHL1	-0.568397	5e-05	0.00214872
ENSG00000128050	PAICS	-0.586811	5e-05	0.00214872
ENSG00000170846	AC093323.3	-0.529126	0.0004	0.0116187
ENSG00000145284	SCD5	-0.782132	5e-05	0.00214872
ENSG00000181751	C5orf30	-1.1648	5e-05	0.00214872
ENSG00000155324	GRAMD3	-0.879639	5e-05	0.00214872
ENSG00000164284	GRPEL2	-0.621789	5e-05	0.00214872
ENSG00000155850	SLC26A2	-1.00292	0.0001	0.00380045
ENSG00000120129	DUSP1	-0.510692	0.00045	0.0128703
ENSG00000170085	SIMC1	-0.515663	0.0018	0.0378045
ENSG00000079215	SLC1A3	-1.52096	5e-05	0.00214872
ENSG00000123219	CENPK	-0.660319	0.00065	0.0170219
ENSG00000197822	OCLN	-0.586608	0.0016	0.0345122
ENSG00000153140	CETN3	-0.497293	0.00105	0.0253209
ENSG00000224531	SMIM13	-0.521784	0.00215	0.0428466
ENSG00000079819	EPB41L2	-0.969715	0.0002	0.00669062
ENSG00000118523	CTGF	-0.65658	5e-05	0.00214872
ENSG00000112319	EYA4	-2.88873	5e-05	0.00214872
ENSG00000118515	SGK1	-0.682902	0.00035	0.010475
ENSG00000131013	PPIL4	-0.688475	5e-05	0.00214872
ENSG00000203711	C6orf99	-1.05843	0.0006	0.0158362
ENSG00000112312	GMNN	-0.596945	0.00015	0.0053038
ENSG00000182952	HMGN4	-0.523926	5e-05	0.00214872
ENSG00000137310	TCF19	-0.6959	5e-05	0.00214872
ENSG00000204389	HSPA1A	-0.602264	5e-05	0.00214872
ENSG00000204388	HSPA1B	-0.732688	5e-05	0.00214872
ENSG00000031691	CENPQ	-0.691047	5e-05	0.00214872
ENSG00000112118	MCM3	-0.531552	0.00015	0.0053038
ENSG00000164430	MB21D1	-0.906577	5e-05	0.00214872
ENSG00000198478	SH3BGRL2	-0.498826	0.0002	0.00669062
ENSG00000106366	SERPINE1	-1.01563	5e-05	0.00214872
ENSG00000086300	SNX10	-0.720105	0.0005	0.0138972
ENSG00000183696	UPP1	-0.497928	0.00025	0.00815175
ENSG00000126524	SBDS	-0.536801	0.0011	0.0262248
ENSG00000225648	SBDSP1	-0.690575	5e-05	0.00214872
ENSG00000196313	POM121	-0.543672	0.0005	0.0138972
ENSG00000130305	NSUN5	-0.744131	5e-05	0.00214872
ENSG00000009954	BAZ1B	-0.568978	5e-05	0.00214872
ENSG00000106638	TBL2	-0.740622	0.00045	0.0128703
ENSG00000189143	CLDN4	-0.794438	5e-05	0.00214872
ENSG00000106682	EIF4H	-0.52211	0.00035	0.010475
ENSG00000049541	RFC2	-0.964433	5e-05	0.00214872
ENSG00000127955	GNAI1	-0.563539	0.0025	0.0483276
ENSG00000127920	GNG11	-0.690478	5e-05	0.00214872
ENSG00000251003	ZFPM2-AS1	-1.12267	0.00015	0.0053038
ENSG00000136982	DSCC1	-0.632143	0.0001	0.00380045
ENSG00000132294	EFR3A	-0.607282	0.00055	0.0149643
ENSG00000104472	CHRAC1	-0.554916	0.0016	0.0345122
ENSG00000130193	THEM6	-0.59356	5e-05	0.00214872
ENSG00000167656	LY6D	-0.527267	5e-05	0.00214872
ENSG00000178896	EXOSC4	-0.983925	5e-05	0.00214872
ENSG00000179091	CYC1	-0.566237	0.0001	0.00380045
ENSG00000147804	SLC39A4	-0.695468	0.00035	0.010475
ENSG00000160972	PPP1R16A	-0.73343	0.00255	0.0488434
ENSG00000160957	RECQL4	-0.915756	0.00165	0.035318
ENSG00000134013	LOXL2	-0.844394	0.0007	0.0179939
ENSG00000147592	LACTB2	-0.753927	5e-05	0.00214872
ENSG00000156469	MTERF3	-0.717625	5e-05	0.00214872
ENSG00000148229	POLE3	-0.627484	5e-05	0.00214872
ENSG00000171159	C9orf16	-0.669429	0.00125	0.028738
ENSG00000169583	CLIC3	-0.677162	0.00035	0.010475
ENSG00000182154	MRPL41	-0.613491	0.00035	0.010475
ENSG00000107201	DDX58	-0.561726	5e-05	0.00214872
ENSG00000137124	ALDH1B1	-0.634648	5e-05	0.00214872
ENSG00000148019	CEP78	-0.631631	0.0001	0.00380045
ENSG00000135069	PSAT1	-4.44447	5e-05	0.00214872
ENSG00000178966	RMI1	-0.491156	0.0013	0.0297244
ENSG00000204291	COL15A1	-0.991034	5e-05	0.00214872
ENSG00000197565	COL4A6	-1.00269	5e-05	0.00214872
ENSG00000205542	TMSB4X	-1.33024	5e-05	0.00214872
ENSG00000260822	GS1-358P8.4	-0.613104	5e-05	0.00214872
ENSG00000102218	RP2	-0.66817	5e-05	0.00214872
